# Supplementary material for: Wearable energy-dense and power-dense supercapacitor yarns enabled by scalable graphene–metallic textile composite electrodes
Source: PubMed Central journal article supplement (PMC4490556; doi:10.1038/ncomms8260), 2015-06-11
Supplement: ncomms8260-s1.pdf [file ncomms8260-s1.pdf]

## Supporting Information

### Supplementary Figures

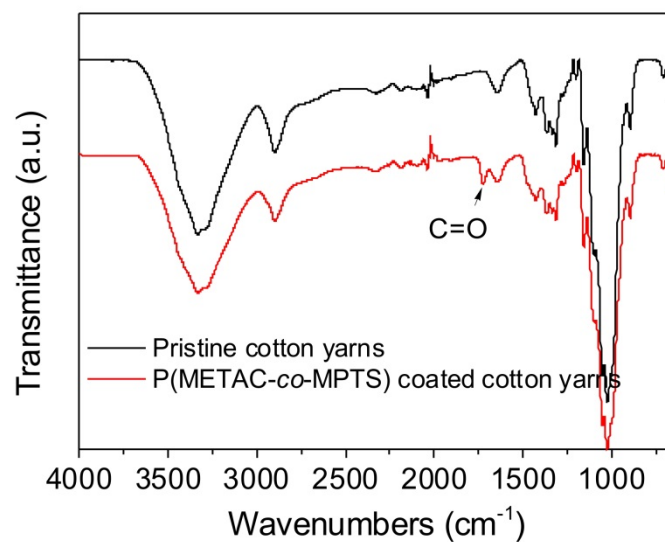

**Supplementary Fig. 1** FT-IR spectra of pristine cotton yarns and copolymer coated cotton yarns. The appearance of C=O stretching ( $1737 \text{ cm}^{-1}$ ) indicates that the copolymer is coated on the surface of cotton yarns.

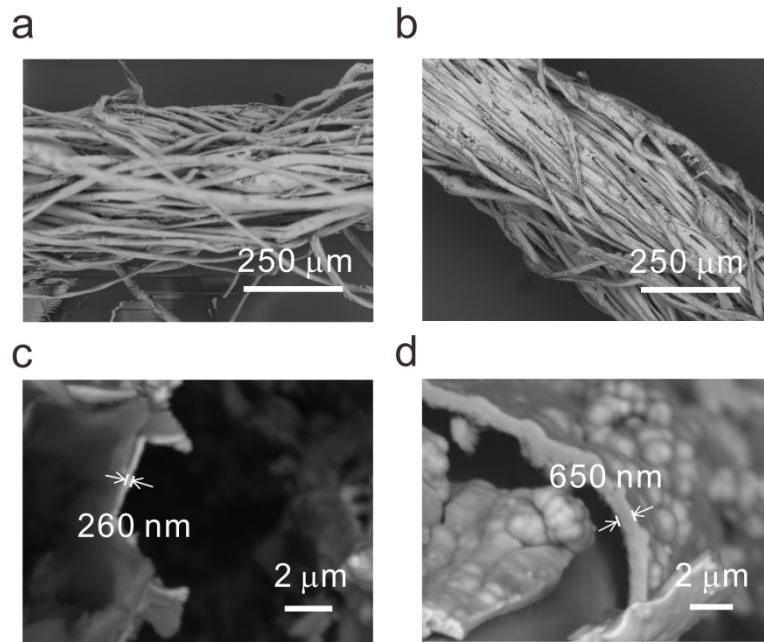

**Supplementary Fig. 2** (a, c) SEM images of Ni-coated cotton yarns made with 30 min ELD. (b, d) SEM images of Ni-coated cotton yarns made with 120 min ELD.

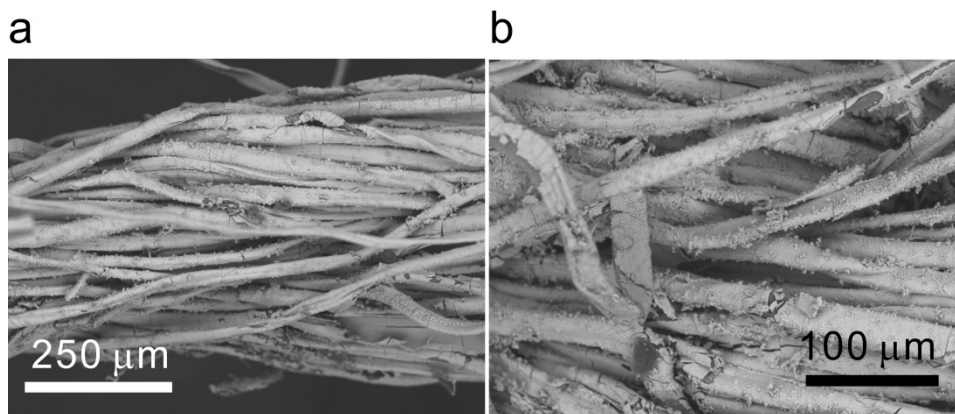

**Supplementary Fig. 3** SEM images of Ni-coated cotton yarn after bending 5000 cycles at a bending radius of 1 mm.

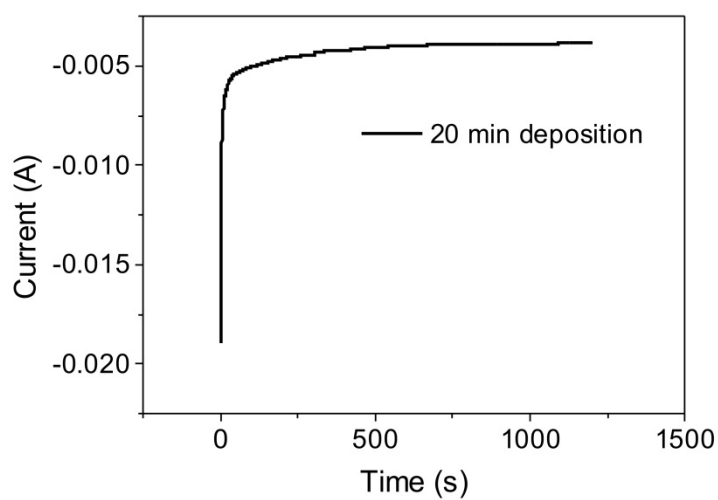

**Supplementary Fig. 4** A representative  $I-t$  curve of the electrochemical deposition of RGO on Ni-coated cotton yarns at a constant potential of -1.2 V.

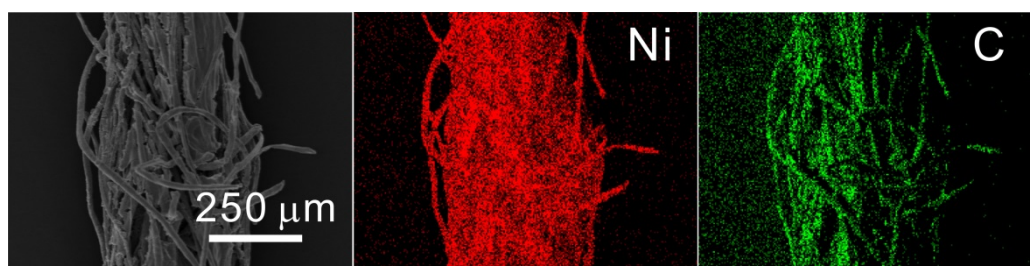

**Supplementary Fig. 5** SEM images and EDX mapping of RGO/Ni-cotton composite electrode yarns made with 10 min electrochemical deposition.

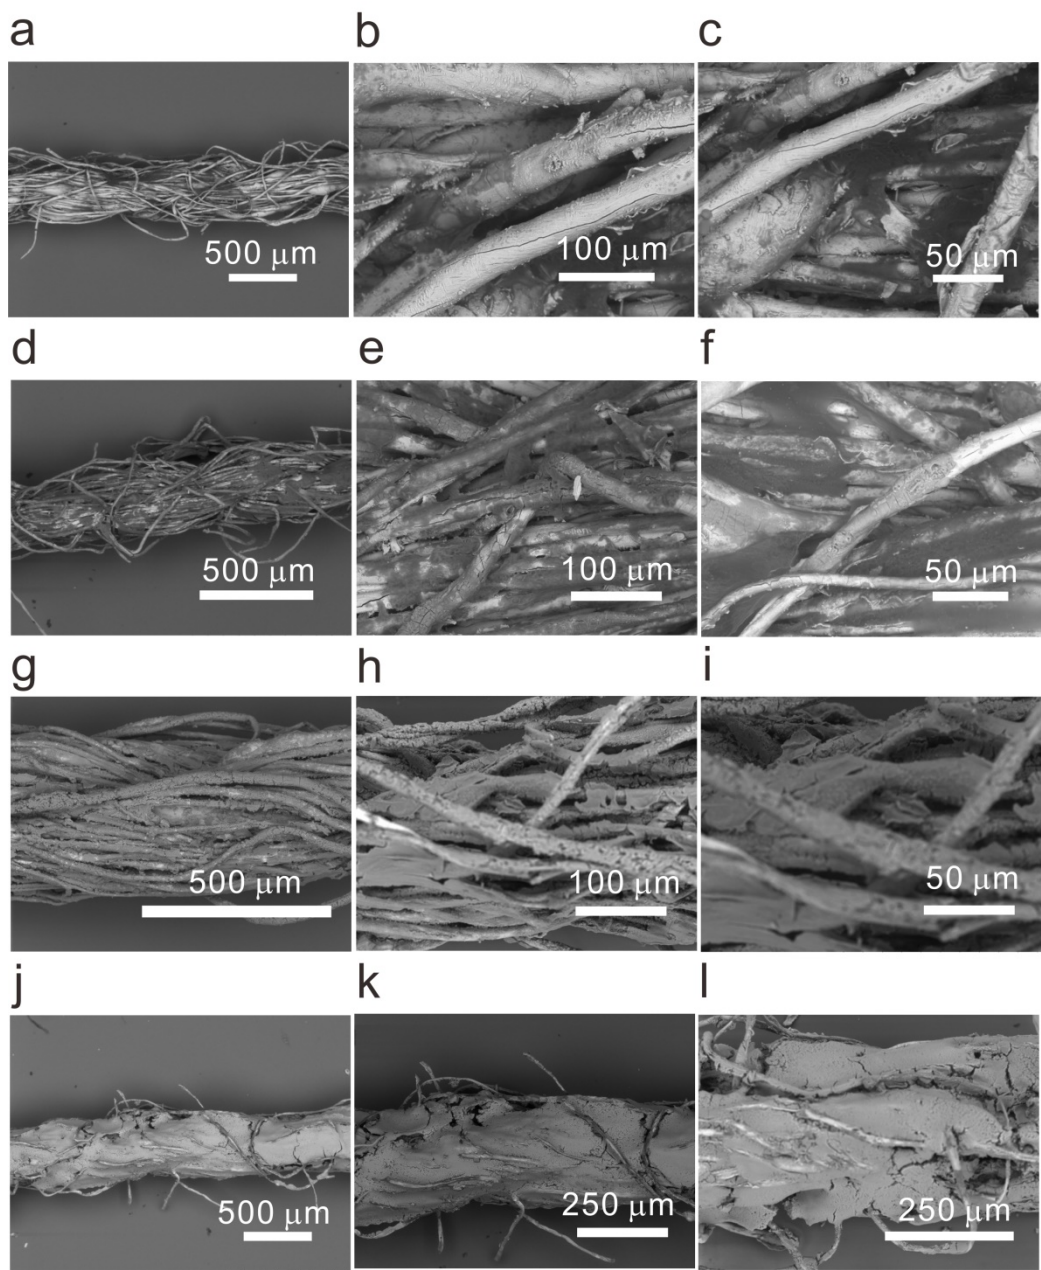

**Supplementary Fig. 6** SEM images of RGO/Ni-cotton composite electrode yarns made with (a-c) 1 min, (d-f) 5 min, (g-i) 10 min and (j-l) 20 min electrochemical deposition.

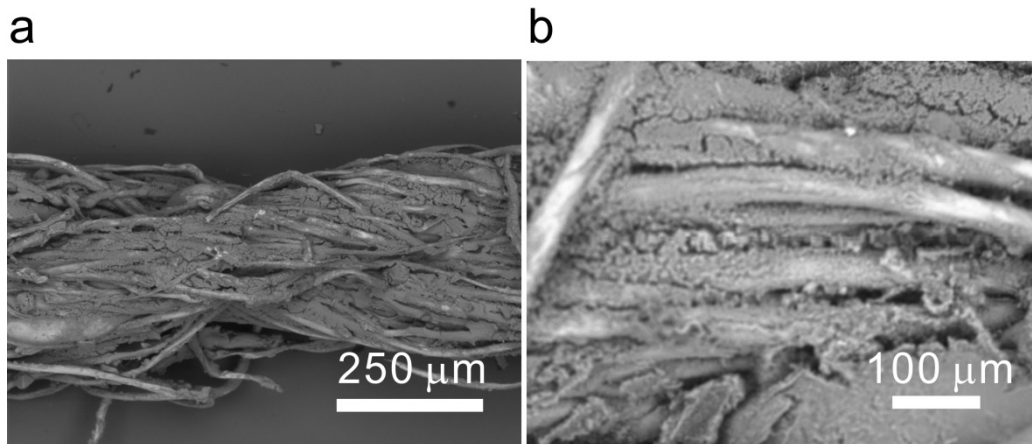

**Supplementary Fig. 7** SEM images of RGO/Ni cotton yarn electrode after bending 4000 cycles at a bending radius of 1 mm.

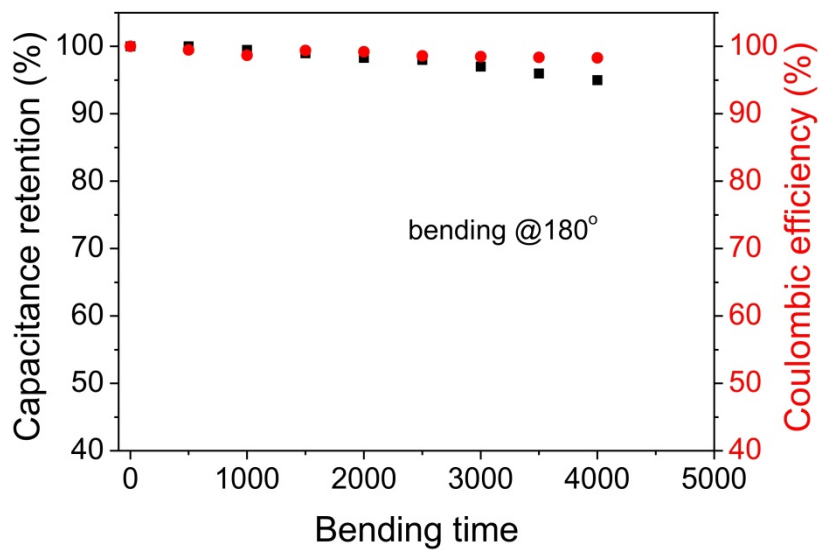

**Supplementary Fig. 8** Capacitance retention (square) and coulombic efficiency (circle) of the device at different bending times.

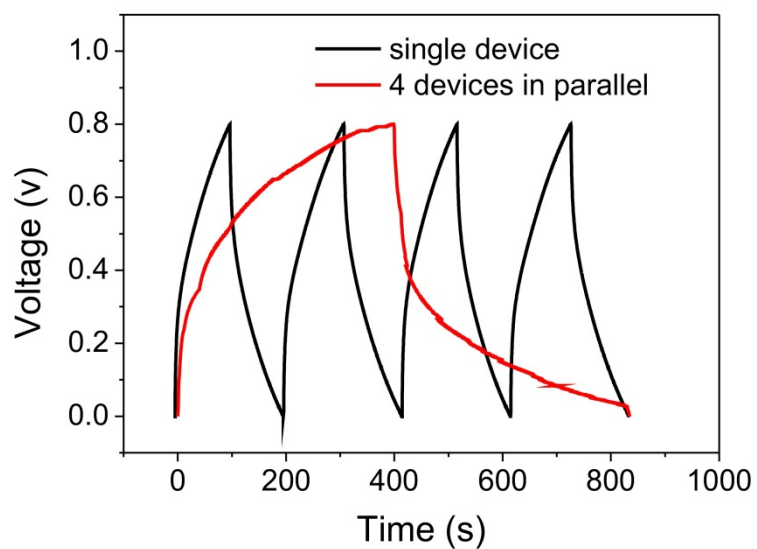

**Supplementary Fig. 9** Galvanostatic charge/discharge curves for four supercapacitors connected in parallel.

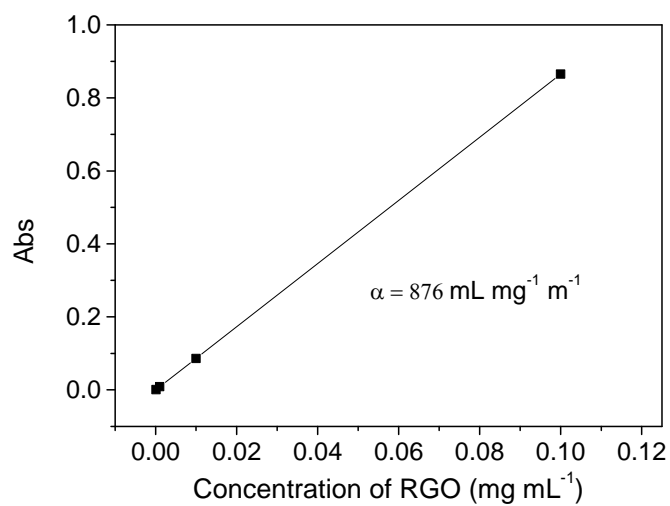

**Supplementary Fig. 10** UV-vis measurement to determine the absorption coefficient of RGO aqueous solutions.

## Supplementary Tables

**Supplementary Table 1** Characteristic of the cotton yarn at different electroless deposition time.

| <b>ELD time (min)</b> | <b>Thickness (nm)</b> | <b>Resistance (<math>\Omega \text{ cm}^{-1}</math>)</b> | <b>Density (<math>\text{g cm}^{-3}</math>)</b> |
|-----------------------|-----------------------|---------------------------------------------------------|------------------------------------------------|
| 30                    | $260 \pm 5$           | $2.2 \pm 0.2$                                           | $2.27 \pm 0.05$                                |
| 60                    | $340 \pm 5$           | $1.6 \pm 0.2$                                           | $2.33 \pm 0.05$                                |
| 120                   | $650 \pm 5$           | $1.3 \pm 0.2$                                           | $2.45 \pm 0.05$                                |

**Supplementary Table 2.** Comparison of electrochemical performance of yarn/fiber-based supercapacitors.

| Electrode materials                                                                                                         | Electrolyte materials                        | $C_L$<br>(mF cm <sup>-1</sup> ) | $C_m$<br>(F g <sup>-1</sup> ) | $C_v$<br>(F cm <sup>-3</sup> ) | Cycle life                                              | Bending fatigue       | $P_v$<br>(mW cm <sup>-3</sup> ) | $E_v$<br>(mWh cm <sup>-3</sup> ) | Source    |
|-----------------------------------------------------------------------------------------------------------------------------|----------------------------------------------|---------------------------------|-------------------------------|--------------------------------|---------------------------------------------------------|-----------------------|---------------------------------|----------------------------------|-----------|
| RGO/Ni-cotton yarn                                                                                                          | PVA/LiCl                                     | 110                             | 311                           | 68.2                           | 92% @ 4000 <sup>th</sup> ;<br>82% @ 10000 <sup>th</sup> | 95% @<br>4000 cycles  | 1400                            | 6.1                              | This work |
| CNT/Carbon fiber                                                                                                            | PVA/H <sub>3</sub> PO <sub>4</sub>           | 6.3                             | -                             | -                              | 94% @ 1000 <sup>th</sup>                                | -                     | 2.7                             | 0.14                             | 44        |
| MnO <sub>2</sub> /CNT fiber                                                                                                 | LiPF <sub>6</sub>                            | -                               | -                             | -                              | 97% @ 1000 <sup>th</sup>                                |                       | 790                             | 1.7                              | 23        |
| CNT/MnO <sub>2</sub> yarn                                                                                                   | PVA/KOH                                      | -                               | -                             | 25.4                           |                                                         | 100% @<br>1000 cycles | 127                             | 3.52                             | 49        |
| MnO <sub>2</sub> /ZnO/Carbon fiber                                                                                          | PVA/LiCl                                     | -                               | -                             | 0.325                          | 87.5% @ 10000 <sup>th</sup>                             | -                     | 20                              | 0.04                             | 50        |
| PPy/MnO <sub>2</sub> /Carbon fiber                                                                                          | PVA/H <sub>3</sub> PO <sub>4</sub>           | -                               | -                             | 69.3                           | 86.7% @ 1000 <sup>th</sup>                              | -                     | 400                             | 6.16                             | 51        |
| RGO/SWCNT fiber                                                                                                             | PVA/H <sub>3</sub> PO <sub>4</sub>           | -                               | -                             | 45                             | 93% @ 10000 <sup>th</sup>                               | 97% @<br>1000 cycles  | 1085                            | 6.3                              | 28        |
| RGO/CNT                                                                                                                     | PVA/H <sub>3</sub> PO <sub>4</sub>           | 5.3                             | -                             | 158                            | No decay after<br>2000 <sup>th</sup>                    | 98% @<br>200 cycles   | 18                              | 3.5                              | 25        |
| PEDOT/CNT/Pt wire                                                                                                           | PVA/H <sub>2</sub> SO <sub>4</sub>           | -                               | -                             | 179                            | -                                                       | 98% @<br>2000 cycles  | 40000                           | 1.4                              | 22        |
| CNT/PANI/Pt fiber                                                                                                           | PVA/ H <sub>3</sub> PO <sub>4</sub>          | 0.24                            | 86.2                          | -                              | -                                                       | -                     | -                               | -                                | 52        |
| Carbon/Cotton/Stainless Steel fiber                                                                                         | PVA/H <sub>3</sub> PO <sub>4</sub> /<br>SiWA | 37                              | 120                           | -                              | -                                                       | -                     | -                               | -                                | 53        |
| PPy, polypyrrole; SWCNT, single-walled carbon nanotube; PEDOT, poly(3,4-ethylenedioxythiophene); SiWA, silicotungstic acid. |                                              |                                 |                               |                                |                                                         |                       |                                 |                                  |           |



**Supplementary Table 3.** Properties of RGO/Ni-cotton composite electrode yarns characterized by the nitrogen adsorption and desorption measurements.

|                                                        | <b>Cotton<br/>yarns</b> | <b>Ni-coated<br/>cotton<br/>yarns</b> | <b>5 min RGO<br/>deposition</b> | <b>10 min<br/>RGO<br/>deposition</b> | <b>20 min<br/>RGO<br/>deposition</b> |
|--------------------------------------------------------|-------------------------|---------------------------------------|---------------------------------|--------------------------------------|--------------------------------------|
| <b>Surface area<br/>(m<sup>2</sup> g<sup>-1</sup>)</b> | 2.77                    | 3.37                                  | 5.60                            | 7.11                                 | 7.66                                 |
| <b>Pore volume<br/>(cm<sup>3</sup> g<sup>-1</sup>)</b> | 0.01                    | 0.008                                 | 0.015                           | 0.015                                | 0.014                                |
| <b>Pore size<br/>(nm)</b>                              | 1.5~50                  | 1.5~50                                | 1.5~55                          | 1.5~55                               | 1.5~55                               |
